# Supplementary material
Source: publisher figshare collection journal article supplement (https://tandf.figshare.com/articles/dataset/_/7369943)
Supplement: Supplementary file 1 [file 2]

Archive with 4 entries (4 files):
- Additional file 1.pdf
- Additional file 2.pdf
- Additional file 3.pdf
- Additional file 4.pdf
