# Supplementary material
Source: publisher figshare collection journal article supplement (https://tandf.figshare.com/articles/dataset/_/7369943)
Supplement: Supplementary file 1 [file 2 › Additional file 1.pdf]

**Supplementary Table 1** Associations between MRP2 expression and breast cancer recurrence using the H-score median as cut-off.

|                                           | ER+/TAM+                  |                                     |                                      | ER-/TAM-                  |                                     |                                      |
|-------------------------------------------|---------------------------|-------------------------------------|--------------------------------------|---------------------------|-------------------------------------|--------------------------------------|
|                                           | Cases/<br>controls<br>(n) | Matched OR<br>(95% CI) <sup>a</sup> | Adjusted OR<br>(95% CI) <sup>b</sup> | Cases/<br>controls<br>(n) | Matched OR<br>(95% CI) <sup>a</sup> | Adjusted OR<br>(95% CI) <sup>b</sup> |
| MRP2 expression by<br>median <sup>∞</sup> |                           |                                     |                                      |                           |                                     |                                      |
| None                                      | 179/191                   | 1                                   | 1                                    | 147/139                   | 1                                   | 1                                    |
| Positive                                  | 255/232                   | 0.91 (0.67,1.23)                    | 0.84 (0.63,1.12)                     | 110/112                   | 1.06 (0.72,1.55)                    | 0.99 (0.66,1.47)                     |

<sup>a</sup> Estimated using conditional logistic regression with conditioning on the matched factors (ER status, diagnosis year, county, menopausal status and UICC stage)

<sup>b</sup> Estimated using logistic regression with additional adjustment for receipt of chemotherapy, receipt of radiotherapy, surgery type, age at diagnosis and comorbidity. Adjusted ORs resulted in a different number of cases/controls than matched ORs: ER+/TAM+=423/414, ER-/TAM-=245/212.

<sup>∞</sup> Median based on the study population = 13.33.

**Supplementary Table 2** Association between baseline MRP2 expression and breast cancer recurrence, by median time to recurrence, in the ER+/TAM+ group.

| Time to<br>recurrence<br>(yrs post<br>diagnosis) | Median<br>time to<br>recurrence<br>(yrs) <sup>∞</sup> | Cases/<br>controls | MRP2                                |                                      |
|--------------------------------------------------|-------------------------------------------------------|--------------------|-------------------------------------|--------------------------------------|
|                                                  |                                                       |                    | Matched OR<br>(95% CI) <sup>a</sup> | Adjusted OR<br>(95% CI) <sup>b</sup> |
| 1-5                                              | 2.8                                                   | 332/126            | 0.99 (0.60,1.64)                    | 1.09 (0.64,1.85)                     |
| 6-10                                             | 6.6                                                   | 102/297            | 1.23 (0.73,2.08)                    | 1.25 (0.72,2.14)                     |

<sup>∞</sup> Median time to recurrence based on recurrent cases.

<sup>a</sup> Estimated using conditional logistic regression with conditioning on the matched factors (diagnosis year, county of residence, menopausal status and UICC stage).

<sup>b</sup> Estimated using logistic regression with additional adjustment for receipt of chemotherapy, receipt of radiotherapy, surgery type, age at diagnosis and comorbidity. Adjusted ORs resulted in a different number of cases/controls than matched ORs: 2.8 yrs=327/122, 6.6 yrs=96/292

**Supplementary Table 3** Associations between MRP2 expression and breast cancer recurrence by chemotherapy group, within ER/TAM group.

|                | ER+/TAM+                  |                                     |                                      | ER-/TAM-                  |                                     |                                      |
|----------------|---------------------------|-------------------------------------|--------------------------------------|---------------------------|-------------------------------------|--------------------------------------|
|                | Cases/<br>Controls<br>(n) | Matched OR<br>(95% CI) <sup>a</sup> | Adjusted OR<br>(95% CI) <sup>b</sup> | Cases/<br>Controls<br>(n) | Matched OR<br>(95% CI) <sup>a</sup> | Adjusted OR<br>(95% CI) <sup>b</sup> |
| Chemotherapy – | 377/376                   | 0.99 (0.71,1.38)                    | 1.01 (0.72,1.43)                     | 38/96                     | 0.78 (0.31,1.96)                    | 1.37 (0.40,4.72)                     |
| Chemotherapy + | 116/104                   | 0.51 (0.18,1.43)                    | 0.51 (0.16,1.65)                     | 219/155                   | 0.73 (0.47,1.14)                    | 0.76 (0.48,1.21)                     |

<sup>a</sup> Estimated using conditional logistic regression with conditioning on the matched factors (diagnosis year, county of residence, menopausal status and UICC stage).

<sup>b</sup> Estimated using logistic regression with additional adjustment for receipt of chemotherapy, receipt of radiotherapy, surgery type, age at diagnosis and comorbidity. Adjusted ORs resulted in a different number of cases/controls than matched ORs: ER+/chemotherapy– =367/367, ER+/chemotherapy+ =56/47, ER-/chemotherapy– =33/61, ER-/chemotherapy+ =212/151.

**Supplementary Table 4** Mean differences in MRP2 expression in primary tumor vs. recurrent tumor within strata of chemotherapy.

| MRP2 expression at<br>diagnosis | Difference between H-score in primary tumor vs. recurrent tumor |                              |               |         |
|---------------------------------|-----------------------------------------------------------------|------------------------------|---------------|---------|
|                                 | Cases                                                           | Mean difference <sup>∞</sup> | Std deviation | P-value |
| Chemotherapy–                   | 120                                                             | -7.01                        | 39.85         | 0.1587  |
| Chemotherapy+                   | 82                                                              | +1.10                        | 46.33         | 0.3261  |

<sup>∞</sup> Mean difference was examined with Wilcoxon Signed Rank Test

**Supplementary Table 5** Mean differences in MRP2 expression in primary tumor vs. recurrent distant tumor within ER/TAM groups.

| MRP2 expression at diagnosis | Difference between H-score in primary tumor vs. recurrent tumor |                 |               |         |
|------------------------------|-----------------------------------------------------------------|-----------------|---------------|---------|
|                              | Cases                                                           | Mean difference | Std deviation | P-value |
| ER+/TAM+                     | 93                                                              | -9.21           | 40.72         | 0.1283  |
| ER-/TAM-                     | 59                                                              | +2.37           | 47.54         | 0.3326  |

Mean difference was examined with Wilcoxon Signed Rank Test .The sample is restricted distant recurrences, defined as tumors in any other tissue than breast tissue.

**Supplementary Table 6** Frequencies of MRP2 differences among distant recurrences within ER/TAM groups.

|                | ER+/TAM+<br>N (%) | ER-/TAM-<br>N (%) | Total |
|----------------|-------------------|-------------------|-------|
| Decreased MRP2 | 47 (51)           | 23 (39)           | 70    |
| Stable MRP2    | 6 (6.5)           | 6 (10)            | 12    |
| Increased MRP2 | 40 (43)           | 30 (51)           | 70    |

The table shows the frequencies of cases whose MRP2 expression were either decreased, remained or increased in the recurrent tumor, compared to their primary tumor.
