# Supplementary material
Source: publisher figshare collection journal article supplement (https://tandf.figshare.com/articles/dataset/_/7369943)

Additional file 2

**Supplementary Figure 1** Distributions of MRP2 differences in primary and recurrent tumor pairs within ER/TAM group.

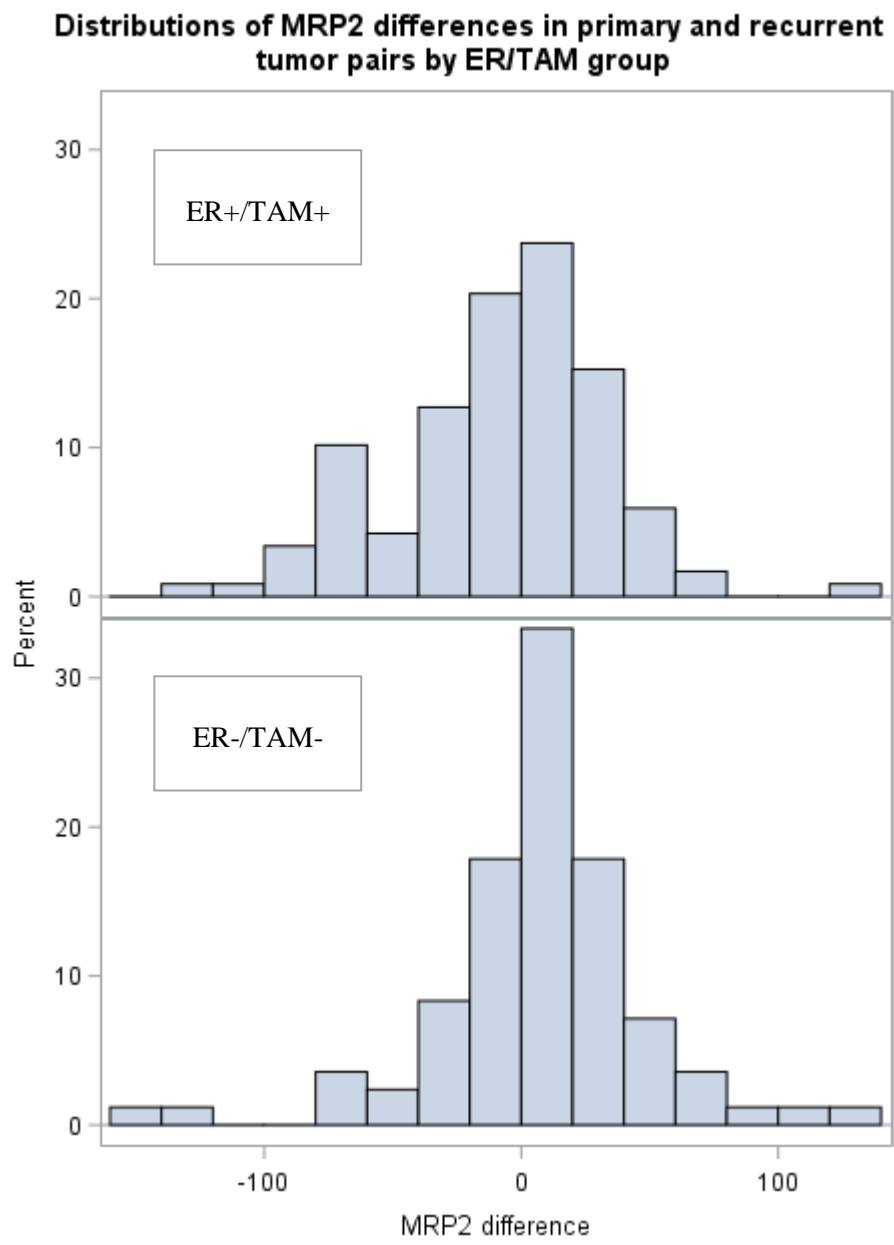

Supplement: Supplementary file 1 [file 2 › Additional file 2.pdf]
