# Supplementary material
Source: publisher figshare collection journal article supplement (https://tandf.figshare.com/articles/dataset/_/7369943)
Supplement: Supplementary file 1 [file 2 › Additional file 3.pdf]

Additional file 3

**Supplementary Figure 2** Restricted cubic spline regression illustrating the adjusted association between breast cancer recurrence and logarithmically transformed H-score, within ER/TAM group.

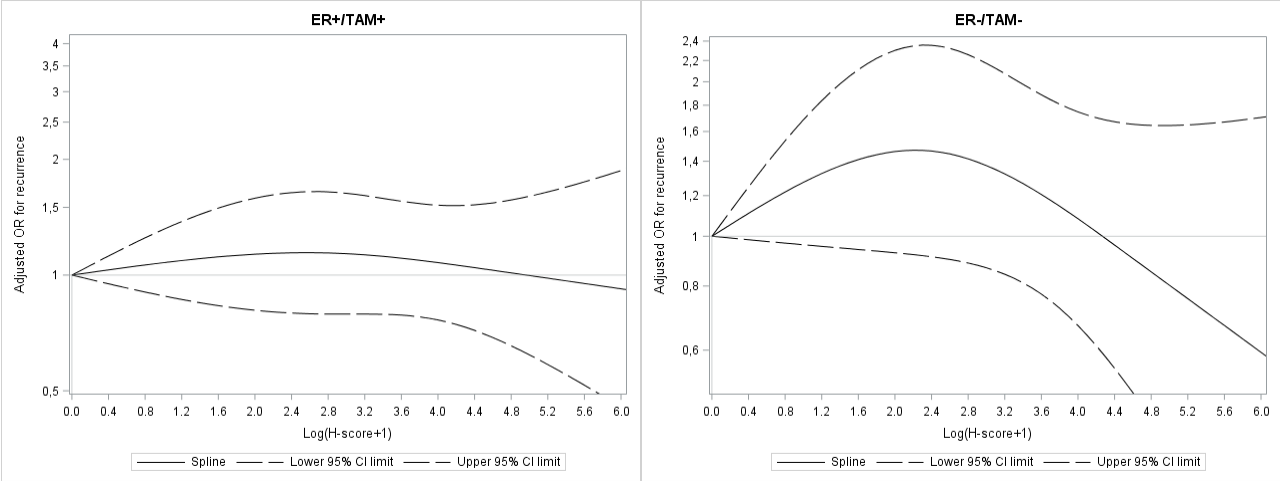

Estimated using restricted cubic splines with 3 knots. Adjusted for year of diagnosis, county of residence, menopausal status, stage, receipt of chemotherapy, receipt of radiotherapy, surgery type, age at diagnosis and comorbidity.
