# Supplementary material
Source: publisher figshare collection journal article supplement (https://tandf.figshare.com/articles/dataset/_/7369943)
Supplement: Supplementary file 1 [file 2 › Additional file 4.pdf]

## Additional file 4

**Supplementary Table 7** Association between baseline MRP2 expression and breast cancer recurrence, by wildtype and heterozygote/variant CYP2D6 within ER/TAM group.

| MRP2 expression at baseline, by CYP2D6 genotype | ER+/TAM+  |              |                                  |                                   | ER-/TAM-  |              |                                  |                                   |
|-------------------------------------------------|-----------|--------------|----------------------------------|-----------------------------------|-----------|--------------|----------------------------------|-----------------------------------|
|                                                 | Cases (n) | Controls (n) | Matched OR <sup>a</sup> (95% CI) | Adjusted OR <sup>b</sup> (95% CI) | Cases (n) | Controls (n) | Matched OR <sup>a</sup> (95% CI) | Adjusted OR <sup>b</sup> (95% CI) |
| Wildtype                                        |           |              |                                  |                                   |           |              |                                  |                                   |
| None                                            | 64        | 66           | 1                                | 1                                 | 43        | 52           | 1                                | 1                                 |
| Positive                                        | 193       | 195          | 0.98 (0.65, 1.48)                | 0.95 (0.56, 1.61)                 | 105       | 96           | 0.73 (0.44, 1.22)                | 0.75 (0.41, 1.34)                 |
| Heterozygote or variant                         |           |              |                                  |                                   |           |              |                                  |                                   |
| None                                            | 42        | 42           | 1                                | 1                                 | 35        | 38           | 1                                | 1                                 |
| Positive                                        | 123       | 105          | 0.95 (0.56, 1.60)                | 1.04 (0.60, 1.79)                 | 64        | 57           | 0.82 (0.45, 1.51)                | 0.94 (0.46, 1.93)                 |

ER+, Wildtype, adjusted cases/controls n=249/256

ER+, Heterozygote or variant, adjusted cases/controls n=126/121

ER-, Wildtype, adjusted cases/controls n=142/123

ER-, Heterozygote or variant, adjusted cases/controls n=93/81

**Supplementary Table 8** Association between baseline MRP2 expression and breast cancer recurrence, by wildtype and heterozygote/variant UGT2B15\*2 within ER/TAM group.

| MRP2 expression at baseline, by UGT2B15*2 genotype | ER+/TAM+  |              |                                  |                                   | ER-/TAM-  |              |                                  |                                   |
|----------------------------------------------------|-----------|--------------|----------------------------------|-----------------------------------|-----------|--------------|----------------------------------|-----------------------------------|
|                                                    | Cases (n) | Controls (n) | Matched OR <sup>a</sup> (95% CI) | Adjusted OR <sup>b</sup> (95% CI) | Cases (n) | Controls (n) | Matched OR <sup>a</sup> (95% CI) | Adjusted OR <sup>b</sup> (95% CI) |
| Wildtype (A)                                       |           |              |                                  |                                   |           |              |                                  |                                   |
| None                                               | 33        | 31           | 1                                | 1                                 | 24        | 27           | 1                                | 1                                 |
| Positive                                           | 96        | 83           | 1.13 (0.61, 2.09)                | 1.24 (0.65, 2.36)                 | 52        | 51           | 0.92 (0.46, 1.86)                | 0.77 (0.35, 1.74)                 |
| Heterozygote (AB) or Variant (B)                   |           |              |                                  |                                   |           |              |                                  |                                   |
| None                                               | 72        | 77           | 1                                | 1                                 | 55        | 63           | 1                                | 1                                 |
| Positive                                           | 222       | 222          | 0.92 (0.63, 1.35)                | 0.93 (0.63, 1.37)                 | 119       | 100          | 0.71 (0.45, 1.14)                | 0.72 (0.42, 1.23)                 |

ER+, Wildtype, adjusted cases/controls n=127/113

ER+, Heterozygote or variant adjusted cases/controls n=286/292

ER-, Wildtype, adjusted cases/controls n=75/64

ER-, Heterozygote or variant adjusted cases/controls n=163/138

**Supplementary Table 9** Association between baseline MRP2 expression and breast cancer recurrence, by wildtype and heterozygote/variant UGT2B7\*2 within ER/TAM group.

| MRP2 expression at baseline, by UGT2B7*2 genotype | ER+/TAM+  |              |                                  |                                   | ER-/TAM-  |              |                                  |                                   |
|---------------------------------------------------|-----------|--------------|----------------------------------|-----------------------------------|-----------|--------------|----------------------------------|-----------------------------------|
|                                                   | Cases (n) | Controls (n) | Matched OR <sup>a</sup> (95% CI) | Adjusted OR <sup>b</sup> (95% CI) | Cases (n) | Controls (n) | Matched OR <sup>a</sup> (95% CI) | Adjusted OR <sup>b</sup> (95% CI) |
| Wildtype (A)                                      |           |              |                                  |                                   |           |              |                                  |                                   |
| None                                              | 36        | 22           | 1                                | 1                                 | 15        | 25           | 1                                | 1                                 |
| Positive                                          | 71        | 72           | 1.55 (0.80, 3.01)                | 1.50 (0.74, 3.05)                 | 35        | 32           | 0.51 (0.21, 1.24)                | 0.61 (0.20, 1.92)                 |
| Heterozygote (AB) or Variant (B)                  |           |              |                                  |                                   |           |              |                                  |                                   |
| None                                              | 70        | 85           | 1                                | 1                                 | 62        | 63           | 1                                | 1                                 |
| Positive                                          | 243       | 229          | 0.80 (0.55, 1.15)                | 0.85 (0.58, 1.24)                 | 132       | 118          | 0.84 (0.54, 1.31)                | 0.80 (0.48, 1.32)                 |

ER+, Wildtype, adjusted cases/controls n=105/94

ER+, Heterozygote or variant adjusted cases/controls n=305/307

ER-, Wildtype, adjusted cases/controls n=49/44

ER-, Heterozygote or variant adjusted cases/controls n=183/156

**Supplementary Table 10** Association between baseline MRP2 expression and breast cancer recurrence, by Apolipoprotein D (ApoD) expression within ER/TAM group.

| MRP2 expression at baseline, by ApoD expression | ER+/TAM+  |              |                                  |                                   | ER-/TAM-  |              |                                  |                                   |
|-------------------------------------------------|-----------|--------------|----------------------------------|-----------------------------------|-----------|--------------|----------------------------------|-----------------------------------|
|                                                 | Cases (n) | Controls (n) | Matched OR <sup>a</sup> (95% CI) | Adjusted OR <sup>b</sup> (95% CI) | Cases (n) | Controls (n) | Matched OR <sup>a</sup> (95% CI) | Adjusted OR <sup>b</sup> (95% CI) |
| ApoD expression = 0                             |           |              |                                  |                                   |           |              |                                  |                                   |
| None                                            | 36        | 37           | 1                                | 1                                 | 26        | 29           | 1                                | 1                                 |
| Positive                                        | 73        | 83           | 1.12 (0.63, 2.01)                | 1.20 (0.65, 2.19)                 | 45        | 38           | 0.85 (0.40, 1.78)                | 0.77 (0.32, 1.86)                 |
| ApoD expression > 0                             |           |              |                                  |                                   |           |              |                                  |                                   |
| None                                            | 30        | 35           | 1                                | 1                                 | 14        | 49           | 1                                | 1                                 |
| Positive                                        | 109       | 105          | 0.76 (0.42, 1.38)                | 0.70 (0.38, 1.30)                 | 49        | 39           | 0.84 (0.33, 2.14)                | 0.56 (0.16, 2.00)                 |

ER+, ApoD expression=0, adjusted cases/controls n=107/118

ER+, ApoD expression>0, adjusted cases/controls n=137/139

ER-, ApoD expression=0, adjusted cases/controls n=68/57

ER-, ApoD expression>0, adjusted cases/controls n=60/44

**Supplementary Table 11** Association between baseline MRP2 expression and breast cancer recurrence, by 14-3-3 ζ expression within ER/TAM group.

| MRP2 expression at baseline, by 14-3-3 ζ expression | ER+/TAM+  |              |                                  |                                   | ER-/TAM-  |              |                                  |                                   |
|-----------------------------------------------------|-----------|--------------|----------------------------------|-----------------------------------|-----------|--------------|----------------------------------|-----------------------------------|
|                                                     | Cases (n) | Controls (n) | Matched OR <sup>a</sup> (95% CI) | Adjusted OR <sup>b</sup> (95% CI) | Cases (n) | Controls (n) | Matched OR <sup>a</sup> (95% CI) | Adjusted OR <sup>b</sup> (95% CI) |
| 14-3-3 ζ expression, 50th percentile or lower       |           |              |                                  |                                   |           |              |                                  |                                   |
| None                                                | 73        | 75           | 1                                | 1                                 | 32        | 41           | 1                                | 1                                 |
| Positive                                            | 173       | 172          | 0.96 (0.65, 1.42)                | 1.03 (0.69, 1.54)                 | 66        | 54           | 0.65 (0.35, 1.21)                | 0.54 (0.26, 1.13)                 |
| 14-3-3 ζ expression, Above 50th percentile          |           |              |                                  |                                   |           |              |                                  |                                   |
| None                                                | 33        | 32           | 1                                | 1                                 | 45        | 47           | 1                                | 1                                 |
| Positive                                            | 150       | 139          | 0.96 (0.55, 1.68)                | 1.01 (0.57, 1.80)                 | 109       | 103          | 0.82 (0.38, 1.76)                | 1.02 (0.57, 1.82)                 |

ER+, 14-3-3 ζ expression, 50th percentile or lower, adjusted cases/controls n=239/240

ER+, 14-3-3 ζ expression, 50th percentile or lower, adjusted cases/controls n=180/169

ER-, 14-3-3 ζ expression, above 50th percentile, adjusted cases/controls n=94/79

ER-, 14-3-3 ζ expression, above 50th percentile, adjusted cases/controls n=147/128

**Supplementary Table 12** Association between baseline MRP2 expression and breast cancer recurrence, by stanniocalcin 1 (STC1) expression within ER/TAM group.

| MRP2 expression at baseline, by STC1 expression | ER+/TAM+  |              |                                  |                                   | ER-/TAM-  |              |                                  |                                   |
|-------------------------------------------------|-----------|--------------|----------------------------------|-----------------------------------|-----------|--------------|----------------------------------|-----------------------------------|
|                                                 | Cases (n) | Controls (n) | Matched OR <sup>a</sup> (95% CI) | Adjusted OR <sup>b</sup> (95% CI) | Cases (n) | Controls (n) | Matched OR <sup>a</sup> (95% CI) | Adjusted OR <sup>b</sup> (95% CI) |
| STC1 expression = 0                             |           |              |                                  |                                   |           |              |                                  |                                   |
| None                                            | 70        | 69           | 1                                | 1                                 | 54        | 41           | 1                                | 1                                 |
| Positive                                        | 141       | 140          | 1.01 (0.67, 1.53)                | 1.07 (0.66, 1.54)                 | 67        | 99           | 0.74 (0.46, 1.17)                | 0.71 (0.42, 1.20)                 |
| STC1 expression > 0                             |           |              |                                  |                                   |           |              |                                  |                                   |
| None                                            | 30        | 32           | 1                                | 1                                 | 20        | 20           | 1                                | 1                                 |
| Positive                                        | 177       | 168          | 0.83 (0.48, 1.46)                | 0.86 (0.49, 1.53)                 | 65        | 59           | 0.73 (0.33, 1.62)                | 0.78 (0.31, 1.92)                 |

ER+, STC1 expression=0, adjusted cases/controls n=211/209

ER+, STC1 expression>0, adjusted cases/controls n=207/200

ER-, STC1 expression=0, adjusted cases/controls n=161/136

ER-, STC1 expression>0, adjusted cases/controls n=83/75

**Supplementary Table 13** Association between baseline MRP2 expression and breast cancer recurrence, by stanniocalcin 2 (STC2) expression within ER/TAM group.

| MRP2 expression<br>at baseline, by<br>STC2 expression | ER+/TAM+     |                 |                                     |                                      | ER-/TAM-     |                 |                                     |                                      |
|-------------------------------------------------------|--------------|-----------------|-------------------------------------|--------------------------------------|--------------|-----------------|-------------------------------------|--------------------------------------|
|                                                       | Cases<br>(n) | Controls<br>(n) | Matched OR <sup>a</sup><br>(95% CI) | Adjusted OR <sup>b</sup><br>(95% CI) | Cases<br>(n) | Controls<br>(n) | Matched OR <sup>a</sup><br>(95% CI) | Adjusted OR <sup>b</sup><br>(95% CI) |
| STC2 expression = 0                                   |              |                 |                                     |                                      |              |                 |                                     |                                      |
| None                                                  | 40           | 34              | 1                                   | 1                                    | 44           | 47              | 1                                   | 1                                    |
| Positive                                              | 109          | 81              | 0.90 (0.51, 1.58)                   | 0.94 (0.53, 1.66)                    | 93           | 78              | 0.84 (0.49, 1.43)                   | 0.73 (0.40, 1.35)                    |
| STC2 expression >0                                    |              |                 |                                     |                                      |              |                 |                                     |                                      |
| None                                                  | 59           | 67              | 1                                   | 1                                    | 26           | 34              | 1                                   | 1                                    |
| Positive                                              | 184          | 203             | 0.99 (0.65, 1.50)                   | 0.98 (0.64, 1.49)                    | 74           | 66              | 0.63 (0.33, 1.19)                   | 0.77 (0.38, 1.59)                    |

ER+, STC2 expression=0, adjusted cases/controls n=149/115  
ER+, STC2 expression=0, adjusted cases/controls n=243/270  
ER-, STC2 expression>0, adjusted cases/controls n=135/103  
ER-, STC2 expression>0, adjusted cases/controls n=98/91
